# Supplementary material for: Understanding Soil Carbon and Phosphorus Dynamics under Grass-Legume Intercropping in a Semi-Arid Region
Source: MDPI journal article supplement (doi:10.3390/agronomy13071692), 2023-06-24
Supplement: s1 [file s1]

## Supplementary Materials

**Table S1.** Package of Practices of NBH, TSH, Cowpea and Cluster bean crops.

| Crop         | Sowing Time | Seed Rate<br>(Rooted slips ha <sup>-1</sup> ) | Spacing<br>(in cm) | Fertilizer Doses<br>N-P <sub>2</sub> O <sub>5</sub> -K (kg ha <sup>-1</sup> ) | Harvesting<br>(DAS) |
|--------------|-------------|-----------------------------------------------|--------------------|-------------------------------------------------------------------------------|---------------------|
| NBH          | Feb – July  | 40,000                                        | 60                 | (50-50-40)                                                                    | 60-75               |
| TSH          | Feb – July  | 40,000                                        | 60                 | (35-45-40)                                                                    | 60-70               |
| Cowpea       | July        | 25 kg ha <sup>-1</sup>                        | 30                 | (20-30-0)                                                                     | 50-60               |
| Cluster bean | July        | 15 kg ha <sup>-1</sup>                        | 30                 | (20-30-0)                                                                     | 60-70               |

**Table S2.** Impact of legume intensification on saloid P, aluminium, iron, calcium bound P, organic P and reductant soluble P (ppm) in 0-15 and 15-30 cm soil layers in a semi-arid Inceptisol. Means with similar lower-case letters within a column are not significantly different as per LSD (p<0.05).

| 0-15 cm           | Saloid P | Al-P    | Fe-P   | Ca-P    | Total P  | Organic P | Res P    |
|-------------------|----------|---------|--------|---------|----------|-----------|----------|
| NBH+cowpea        | 57.74c   | 223.15b | 94.15a | 146.16a | 1213.18a | 287.75a   | 550.40b  |
| TSH+cluster bean  | 48.37d   | 190.90c | 73.34c | 151.50a | 1155.71a | 260.10b   | 583.00ab |
| NBH sole grass    | 77.50a   | 259.69a | 79.01b | 145.25a | 1241.68a | 243.51b   | 581.96ab |
| TSH sole grass    | 68.14b   | 201.77c | 72.47c | 108.54b | 1189.26a | 248.22b   | 598.66a  |
| 15-30 cm          | Saloid P | Al-P    | Fe-P   | Ca-P    | Total P  | Organic P | Res P    |
| NBH+ cowpea       | 41.73c   | 184.66b | 65.02b | 180.49b | 1310.04a | 304.33a   | 618.01a  |
| TSH+ cluster bean | 46.29b   | 176.33b | 87.91a | 127.44c | 1281.07a | 155.04d   | 522.85b  |
| NBH sole grass    | 58.78a   | 207.54a | 62.13b | 80.62d  | 1234.55a | 254.57b   | 517.11b  |
| TSH sole grass    | 42.13c   | 171.13b | 82.70a | 192.98a | 1335.83a | 193.74c   | 488.73b  |

Means with similar lower-case letters within a column are not significantly different as per LSD (p<0.05).

**Table S3.** Impact of legume intensification on carbonate, calcium + magnesium, pH, water soluble C (WSC), potassium, phosphorus, and sodium concentration in leachates in a semi-arid Inceptisol.

|                    | Carbonate<br>(me L <sup>-1</sup> ) | Ca+Mg<br>(me L <sup>-1</sup> ) | pH    | WSC<br>(mg L <sup>-1</sup> ) | K<br>(mg L <sup>-1</sup> ) | P<br>(mg L <sup>-1</sup> ) | EC<br>(ms cm <sup>-1</sup> ) | Na<br>(mg L <sup>-1</sup> ) |
|--------------------|------------------------------------|--------------------------------|-------|------------------------------|----------------------------|----------------------------|------------------------------|-----------------------------|
| NBH + cowpea       | 7.20d                              | 2.60d                          | 8.33a | 0.2a                         | 1.05c                      | 0.031c                     | 0.43ab                       | 19.20c                      |
| TSH + Cluster bean | 14.00c                             | 3.80c                          | 8.22a | 0.2a                         | 0.60d                      | 0.034b                     | 0.41bc                       | 19.40c                      |
| NBH Sole Grass     | 19.20a                             | 5.20a                          | 8.43a | 0.3a                         | 1.50a                      | 0.041a                     | 0.36c                        | 32.40a                      |
| TSH sole grass     | 16.60b                             | 4.40b                          | 8.49a | 0.3a                         | 1.40b                      | 0.042a                     | 0.39c                        | 27.45b                      |

Means with similar lower-case letters within a column are not significantly different as per LSD (p<0.05).

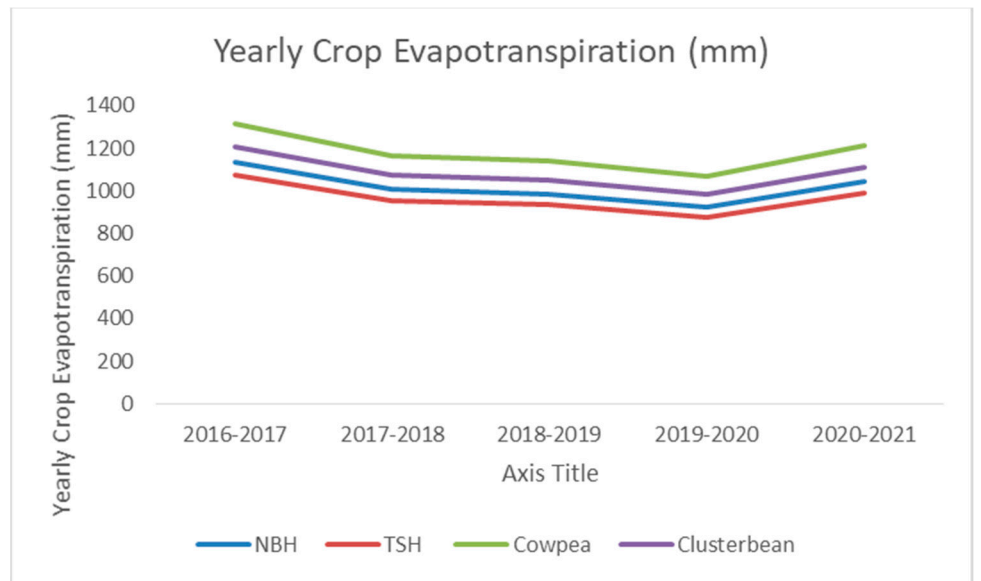

**Figure S1.** Yearly Crop Evapotranspiration (mm) for NBH, TSH, Cowpea and Cluster bean crops.
